# Supplementary material for: Ultrasensitive sensing platform based on Au 0.1 FeCoNiCu high-entropy alloy nanoparticle-DNA walker dual signal amplification for electrochemical detection of miRNA-21
Source: Research Square preprint supplement (doi:10.21203/rs.3.rs-6946913/v1), 2025-07-03
Supplement: Supplementary file 1 [file 9f668113ff5ef62f89b0d9bc.docx]

**Electronic Supporting Information (ESI)**

**Ultrasensitive sensing platform based on Au0.1FeCoNiCu high-entropy alloy nanoparticle-DNA walker dual signal amplification for electrochemical detection of miRNA-21**

**Li Ruiyia*,Li Mingyaoa, Wang Miaob and Li Zaijuna[[1]](#footnote-1)***

*a School of Life Science and Health Engineering, School of Chemical and Material Engineering, Jiangnan University, Wuxi 214122, China*

*b Reproductive Medicine Department, Wuxi Hospital of Traditional Chinese Medicine, Wuxi 214000, China*

**1. Experimental**

1.1. Reagents

Chloroauric acid (HAuCl4) (99.995%), ferric chloride (FeCl3), cobalt chloride (CoCl2), nickel chloride (NiCl2), copper chloride (CuCl2), citric acid, serine, mercaptohexanol (MCH) and K4Fe(CN)6 (>99.95%) were purchased from Sigma-Aldrich Company. The phosphate-buffered solution (PBS, Na2HPO4-NaH2PO4-KCl, 0.1 M, pH 7.4) was prepared in the laboratory. The deionized water was produced by using Millipore Milli-Q grade with a resistivity of 18.2 MΩ cm-1. All oligonucleotides were made and purified by Sangon Biotech. Co., Ltd (Shanghai, China), including MiRNA-21 (5´-UAGCUUAUCAGACUGAUGUUGA-3´), miRNA-21 with single-base mismatch (miRNA-21-1M) (5´-CAGCUUAUCAGACUGAUGUUGA-3´), miRNA-21 with two-base mismatch (miRNA-21-2M) (5´-UAGCUUAUCAGACUGAUGCCGA-3´), miRNA-21 with three-base mismatch (miRNA-21-3M) (5´-CAGCUUAUCAGACUGAUGCCGA-3´), miRNA-210 (5´-CUGUGCGUGUGACAGCGGCUGA-3´), miRNA-221 (5´-AGCUACAUUGUCUGCUGGGU UUC-3´), Aptamer (5´-CGTCAACATCAGTCTGATAAGCTAT TGACG-3´), walker (5´-SH-(CH2)6-TTTTTTTTTTTTTTTTTTTTTTTTTTTTTTCGTCAACTTATCAGACTGATGTAGTTGA CG-3´), H1(5´-SH-(CH2)6-CTACATCAGTCTGATAAGTTGACGAGTGGGTAGGGTAGCGTC AACTTATCAGAC-3´), H2-Fc (5´-AAGTTGACGCTACCCTACCCACTCGTCAACTTCTAAG ACAGTGGGTACTAGGGTATTGGG-Ferrocene--3´) The concentration of oligonucleotides was determined by measuring absorption at 260 nm. The DNA stock solution was prepared in the Tris/Mg/K buffer containing 20 mM Tris-HCl, 1 mM MgCl2, 1 mM CaCl2 and 5 mM KCl at pH 7.4 and stored at -20°C for further use. Before use, H1 and H2 sequence are heated at 95 °C for 5 min and slowly cooled to room temperature at 1 °C min−1 to form stable hairpin structure.

1.2. Structural characterization

Morphology and structure were characterized by scanning electron microscope (SEM, JEOL, S-4800) and transmission electron microscope (TEM, JEOL, Jem-2100). The crystal structure and chemical composition were studied by X-ray diffraction (XRD, Bruker D8 Advance, Cu Kα radiation, λ= 0.15406 nm). The valence states were characterized by X-ray photoelectron spectroscopy (XPS, Kratos, Axis supra) with mono chromated Al KR radiation. The band gap was evaluated by obtaining UV-visible diffuse reflectance spectra by UV-visible spectrophotometer (UV-vis, Shimadzu, UV-3600 Plus). The infrared spectra (IR) were obtained on a Nicolet FT-IR 6700 spectrometer. The UV-visible spectrum was recorded on a TU-1901 spectrometer with a DH-2000 deuterium and tungsten–halogen light source in the absorbance mode (Beijing Purkinje General Instrument Co., Ltd, China).

1.3. Electrochemical measurements

Cyclic voltammetry (CV), electrochemical impedance spectroscopy (EIS) and differential pulse voltammetry (DPV) were measured on a CHI660D electrochemical workstation. The conventional three-electrode testing system was employed for all electrochemical measurements. The sensor, Ag/AgCl electrode and platinum wire were employed as the working electrode, reference electrode and counter electrode, respectively. The EIS measurements were measured at the frequency range from 100 KHz to 1Hz with the potential amplitude of ±5 mV. The DPV parameters were set to scan rate of 4 mV s-1, 50 mV pulse amplitude, 20 ms pulse width and -0.2 V initial potential.

**2. Figures and Tables**

**
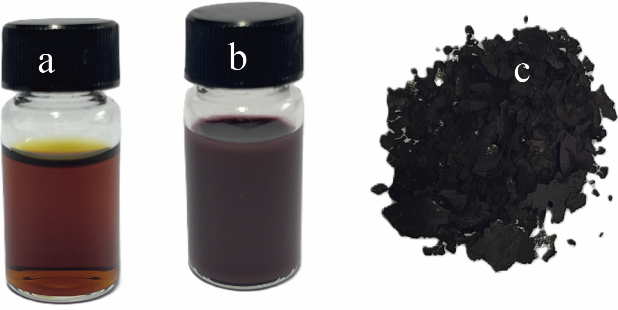

Fig. s1** Optical photographs of SGQD aqueous solution (a), Me-SGQD complex solution (b) and Au0.1FeCoNiCu (c)


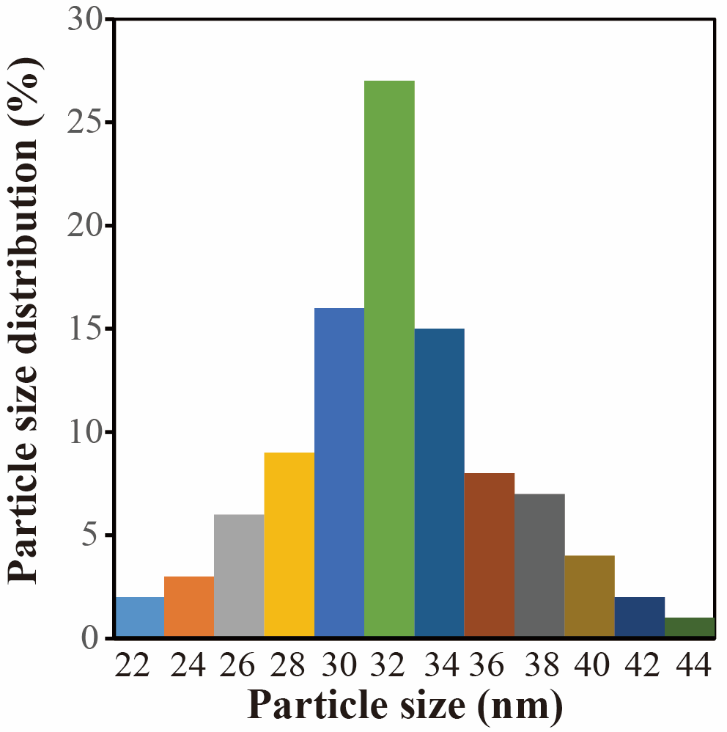


**Fig. s2** Particle size distribution of Au0.1FeCoNiCu nanoparticles


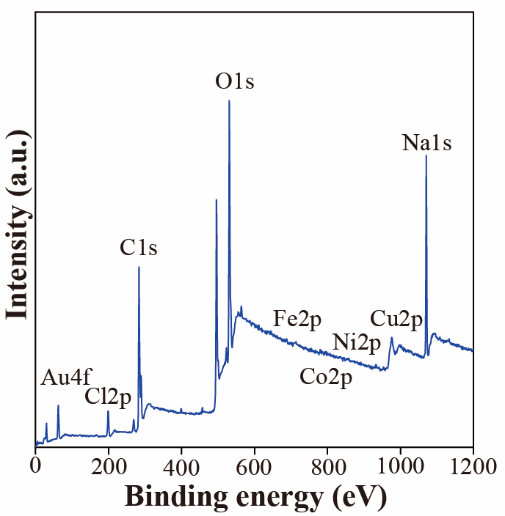


**Fig. s3** Total XPS spectrum of Au0.1FeCoNiCu


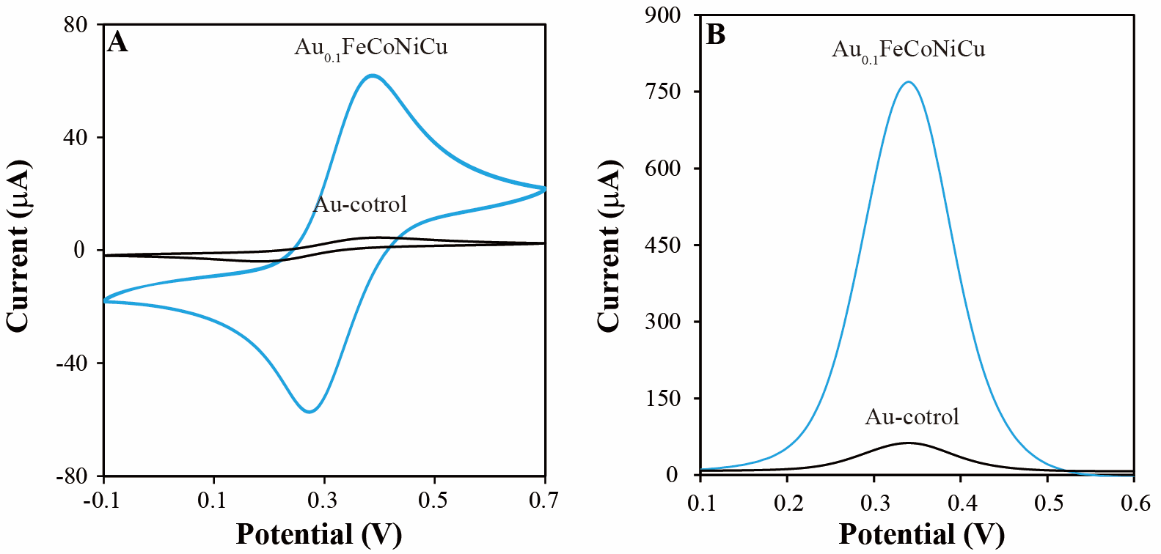


**Fig. s4** CV (A) and DPV curves (B) in 1 mM K4Fe(CN)6 in the PBS of pH 7.4 of GCE electrodes modified by equal mass of Au-control and Au0.1FeCoNiCu


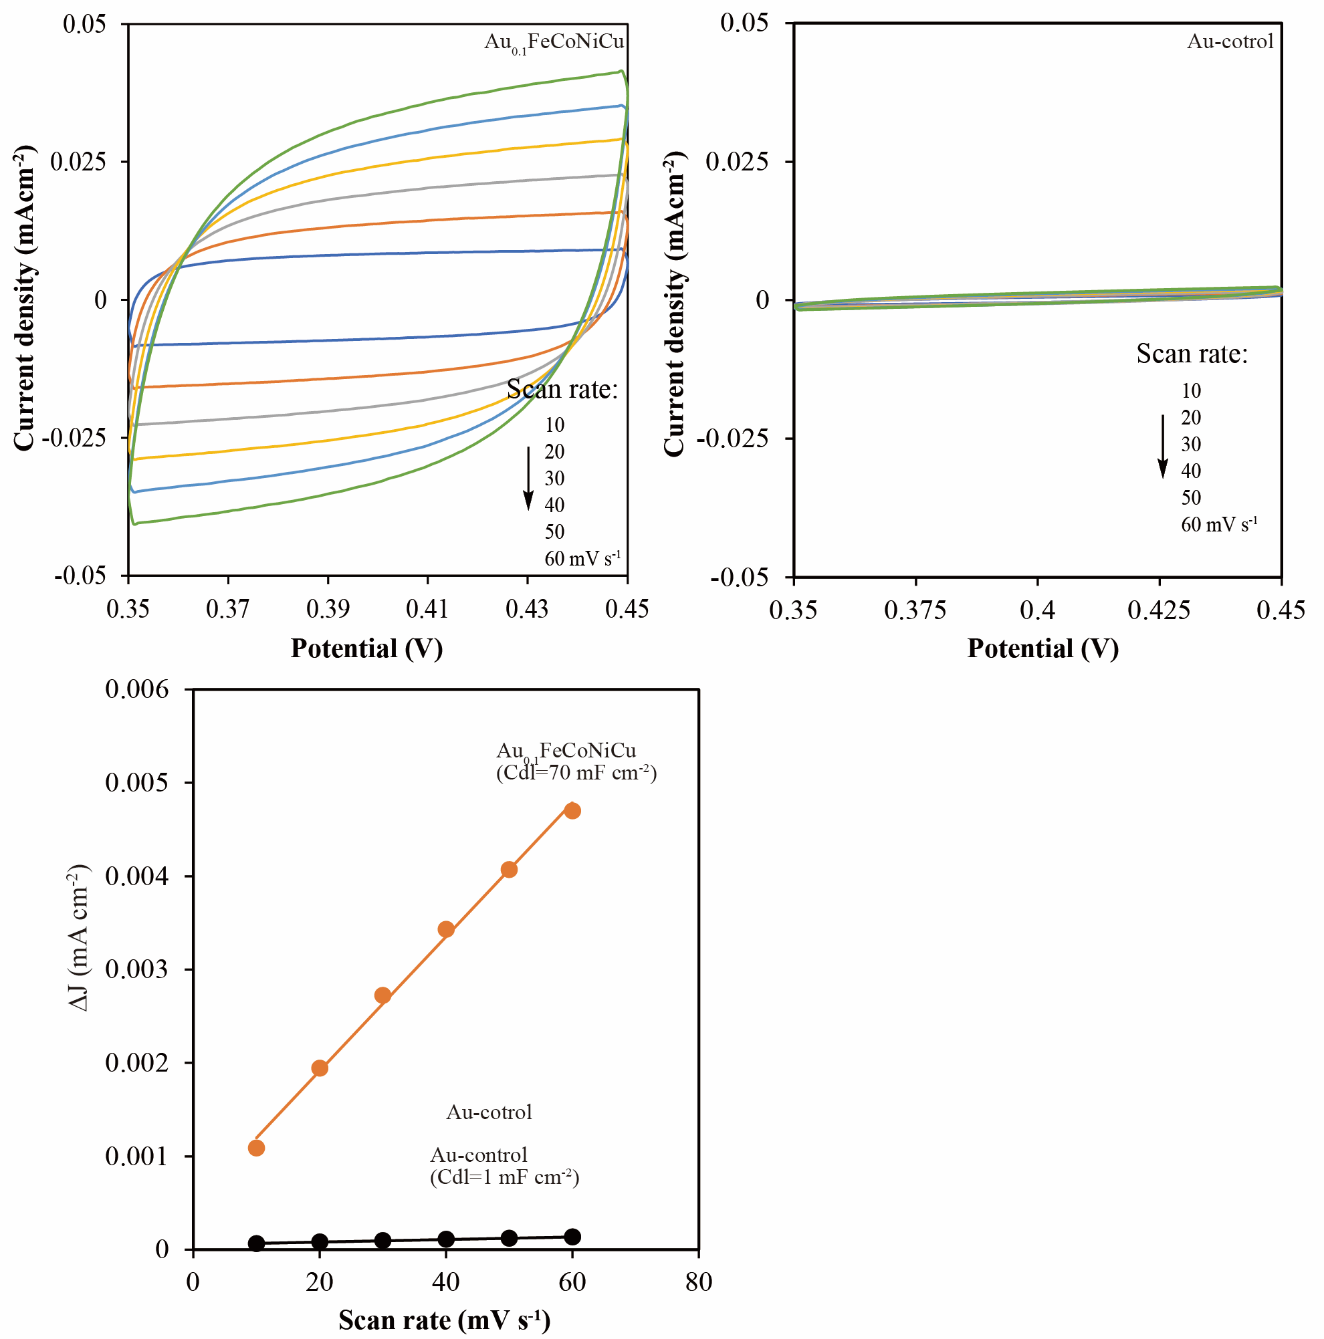


**Fig. s5** CV curves at different scan rate of 10, 20, 30, 40, 50 and 60 mV s-1of Au0.1FeCoNiCu (A) and Au-control electrodes (B), and relationship curves of ΔJ with scan rate (C) of Au0.1FeCoNiCu (A) and Au-control electrodes


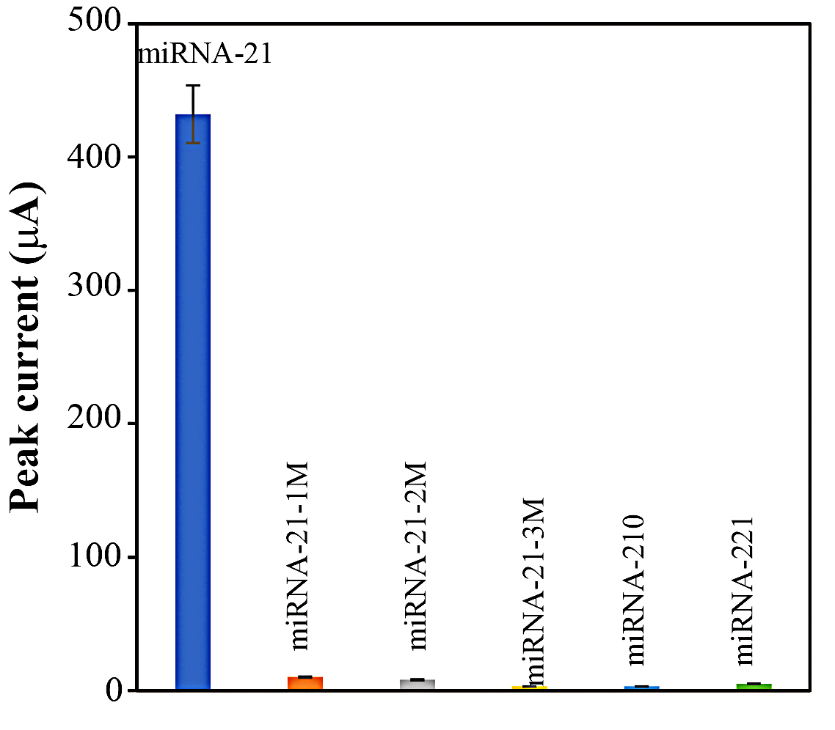


**Fig. s6** The DPV peak current in the presence of 1×10-15 M miRNA-21, miRNA-21-1M, miRNA-21-2M, miRNA-21-3M, miRNA-210, and miRNA-221

**Table s1** EIS of the electrode modification process

| Electrode modification process | RS（Ω） | Rct（Ω） | C (F) | Warburg （Z） |  |
| --- | --- | --- | --- | --- | --- |
| GCE | 266.1 | 605.9 | 1.24E-4 | 0.0045 |  |
| HEA/GCE | 8.1 | 7.9 | 1.24E-3 | 0.0039 |  |
| walker-Apt/H1/HEA/GCE | 166.2 | 274.1 | 9.388E-5 | 0.04668 |  |
| MCH/walker-Apt/H1/ HEA/GCE | 208.5 | 324.1 | 2.677E-4 | 0.06722 |  |
| H2-Fc/MCH/walker-Apt/H1/ HEA/GCE | 5.5 | 6.2 | 9.6E-3 | 0.0022 |  |

**Table S2** Analytical performance of different analytical methods for electrochemical detection of MiRNA-21

| Sensing materials | Signal amplification | Detection technique | Linear range  (M) | LOD  (M) | Sample | Ref |
| --- | --- | --- | --- | --- | --- | --- |
| Polypyrrole/Au | Click chemistry-mediated variable temperature amplification | DPV | 1×10-15-3x10-9 | 5.7×10-14 | Serum | 1 |
| Ti3C2TX | Photocatalytic atom transfer radical polymerization | SWV | 1×10-17-1×10-13 | 2.81×10-18 |  | 2 |
| Magnetite bead | Digestion-to-growth regulated tandem isothermal amplification | DPV | 0-1×10-8 | 3.5×10-14 |  | 3 |
| Au |  | SWV |  | 2×10-9 | Urine | 4 |
| Graphene oxide/Au | DNA cycle | DPV | 2×10-15-1×10-10 | 1.24×10-15 | Plasma | 5 |
| Graphene oxide/graphene |  | DPV | 1×10-14-1×10-9 | 3.18×10-15 |  | 6 |
| MnO2/Au | Hybridization chain reaction and horseradish and peroxidase signal amplification | DPV | 1×10-16-1×10-7 | 6.3×10-17 | Serum | 7 |
| WS2/Ag | Catalytic and electron transfer centre | DPV | 0.01-1000 | 0.00118 | Serum | 8 |
| Pt@CeO2 | Biotin-streptavidin affinity interaction | DPV | 1×10-14-1×10-9 | 1.41×10-15 | Serum | 9 |
| Au/MoS2/Cu2S | Toehold mediated strand displacement reaction |  | 5×10-17-1×10-11 | 8.3×10-18 | Serum | 10 |
| Au0.1FeCoNiCu | DNA walker | DPV | 1×10-20-1×10-15 | 3.4×10-21 | Serum | This work |

**Table S3** The results for detection of miRNA-21 in serum samples by the proposed method (N=5)

| Samples | miRNA-21 added  (aM) | miRNA-21 found by the proposed method  (aM) | Recovery  (%) | RSD  (%) |
| --- | --- | --- | --- | --- |
| Serum sample 1 | 0 | 0.780 ± 0.006 |  | 2.12 |
| 0.5 | 1.292 ± 0.05 | 102.4 | 1.79 |
| Serum sample 2 | 0 | 0.084 ± 0.002 |  | 2.44 |
| 0.5 | 0.578 ± 0.014 | 98.8 | 3.44 |
| Serum sample 3 | 0 | 0.015 ± 0.002 |  | 2.99 |
| 0.5 | 0.521 ± 0.006 | 101.2 | 3.54 |
| Serum sample 4 | 0 | 0.130 ± 0.007 |  | 1.83 |
| 0.5 | 0.622 ± 0.012 | 98.4 | 1.21 |

**References**

[1] X. Liu, Q. Wang, Y. Zhang, Z. Yang, N. Li, Y. Xu, M. Yang, D. Huo, C. Hou, Detecting miRNA-21 using dual-mode biosensor via click chemistry-mediated variable temperature amplification reaction, Chem. Eng. J. 479 (2024) 147231. https://doi.org/10.1016/j.cej.2023.147231

[2] T.T. Nguyen, H. Wang, G. Sun, J. Kong, X. Zhang, T.T. Nguyen, H. Wang, G. Sun, J. Kong, X. Zhang, Microchim. Acta 191 (2024) 472. <https://doi.org/10.1007/s00604-024-06542-7>

[3] C. Yan, J. Xu, L. Yang, B. Yao, G. Liu, W. Chen, Target-triggered substantial stacking of electroactive indicators based on digestion-to-growth regulated tandem isothermal amplification for ultrasensitive miRNA determination, Sensor. Actuat. B-Chem. 344 (2021) 130280. https://doi.org/10.1016/j.snb.2021.130280

[4] W. Cimmino1, D. Migliorelli, S. Singh1, A. Miglione1, S. Generelli, · S. Cinti1, Design of a printed electrochemical strip towards miRNA‑21 detection in urine samples: optimization of the experimental procedures for real sample application, Anal. Bioanal. Chem. (2023) 415:4511-4520. https://doi.org/10.1007/s00216-023-04659-x

[5] A. Khodadoust, N. Nasirizadeh, S.M. Seyfati, R.A.Taheri, M. Ghanei, H. Bagherif, High-performance strategy for the construction of electrochemical biosensor for simultaneous detection of miRNA-141 and miRNA-21 as lung cancer biomarkers, [Talanta](https://www.sciencedirect.com/journal/talanta) 252 (2023) 123863. https://doi.org/10.1016/j.talanta.2022.123863

[6] M.S. Huang, M. Govindasamy, S. Chinnapaiyan, Y.T. Lin, S.Y. Lu, S. Samukawa, C.H. Huang, Electrochemical biosensor based on an atomic layered composite of graphene oxide/graphene as an electrode material towards selective and sensitive detection of miRNA-21, [Microchem. J.](https://www.sciencedirect.com/journal/microchemical-journal) 199 (2024) 110112. https://doi.org/10.1016/j.microc.2024.110112

[7] M. Li, T. Zhang, Y. Zhang, Ultrasensitive electrochemical sensing platform for miRNA-21 detection based on manganese dioxide gold nanoparticle nanoconjugates coupled with hybridization chain reaction and horseradish peroxidase signal amplification, Analyst 148 (2023) 2180–2188. DOI: 10.1039/d3an00490b

[8] S. Fu, C. Xie, Z. Yang, M. Jiang, J. Cheng, C. Zhu, K. Wu, H. Ye, W. Xia, N. Jaffrezic-Renault, Z. Guo, Electrochemical signal amplification strategy based on trace metal ion modified WS2 for ultra-sensitive detection of miRNA-21, Talanta 260 (2023) 124552. <https://doi.org/10.1016/j.talanta.2023.124552>

[9] P. Chen, L. Jiang, X. Xie, D. Sun, J. Liu, Y. Zhao, Y. Li, A.I. B. Tamayo, B. Liu, Y. Miao, R. Ouyang, Rapid electrochemical detection of MiRNA-21 facilitated by the excellent catalytic ability of Pt@CeO2 nanospheres, RSC Adv. 12 (2022)11867–11876. DOI: 10.1039/d2ra01047j.

[10] J. Xu, X. Luo, Y. Li, Y. Liu, J. Lu, X.Lin, K.J. Huang, A self-powered sensor based on hollow bimetallic sulfide and double-strand TSDR amplification achieves sensitive miRNA-21 detection, Sensor. Actuat. B-Chem. 420 (2024) 136487. <https://doi.org/10.1016/j.snb.2024.136487>

1. *Corresponding authors. Tel.: 13912371144. E-mail address: ruiyili@jiangnan.edu.cn and zaijunli@jiangnan.edu.cn [↑](#footnote-ref-1)
